# Supplementary material for: Diet and physical activity and metabolic disorders in patients with schizophrenia and bipolar affective disorder in the Polish population
Source: PeerJ. 2023 Jul 11;11:e15617. doi: 10.7717/peerj.15617 (PMC10348314; doi:10.7717/peerj.15617)
Supplement: Supplemental Information 1 [file peerj-11-15617-s001.xlsx]

## Sheet: participants
Initials	date of birth	age (years)	sex	group	PANSS sum	PANSS positive s.	PANSS negative s.	PANSS general	MADRS/YMRS	year of diagnosis	disease duration (years)	number of hospitalisations	number of relapses	if on medication	medication - duration in years	if off drugs anytime	for how long drugs off	current medication	valproic acid	lithium	lamotrygine	carbamazepine	topiramate	benzos	hypnotics	SSRI	SNRI	other antidepressive drugs	clozapine	olanzapine	quetiapine	amisulpride	haloperidole	pernazine	sulpiride	aripiprasole	risperidone	pregabaline	zuclopentixole	flupentixole	levomepromazine	propranolol	past medication (>2 months)	carbamazepine	valproic acid	lithium	lamotrygine	benzos	hypnotics
		32	f	schizophrenia	108	22	28	58		2008	12	4	4	t	11	t	36			t									t							t							t			t
		48	m	schizophrenia	102	16	25	61		1999	21	4	4	t	20	t	0.5									fluwoksamina									t								t					t
		41	m	schizophrenia	110	26	30	54		2001	19	4	4	t	18	t	36							t									t										t		t			t
CHAD = bipolar disorder		63	m	CHAD - depression					38	1990	30	1	1	t	3	t	1		t							paroksetyna																	t
		39	f	CHAD - depression					24	2006	14	2	4	t	12	t	12				t	t		t		fluoksetyna		t			t												t			t	t	t
odniesienia = reference		52	m	reference - CHAD						1993	27	1	1	t	27	n						t									t												t			t
		54	f	odniesienia - SCHI						1995	25	1	2	t	25	n											wenlafaksyna		t							t							t
t = yes		54	m	reference - CHAD						2001	19	1	1	t	4	t	2.5			t	t						wenlafaksyna																t
n = no		68	f	reference - CHAD						2004	16	0	2	t	15	n				t		t					wenlafaksyna				t												t	t		t
		29	f	CHAD - depression					31	2017	3	1	2	t	5	n				t	t						wenlafaksyna			t	t												t		t	t	t
		45	f	reference - CHAD						2017	3	1	2	t	3	n				t							wenlafaksyna				t												t				t
		27	f	CHAD - mania					39	2018	2	1	1	t	0	n				t				t						t			t										n
		33	f	CHAD - depression					29	2017	3	1	1	t	3	n						t				sertralina										t	t						t			t	t
		48	f	CHAD - depression					31	2013	7	1	2	t	20	t	1.5			t						paroksetyna					t												t	t				t
		23	m	schizophrenia	92	17	28	47		2018	2	1	1	t	2	n								t						t						t		t					t
		27	f	CHAD - depression					33	2016	4	1	2	t	2	t	7			t	t									t													t		t
		58	f	schizophrenia	109	26	31	52		1994	26	4	4	t	25	n				t									t			t											t			t		t
		38	f	schizophrenia	82	12	26	44		2002	18	1	1	t	17	n				t						fluoksetyna		t	t								t					t	t
		49	f	schizophrenia	94	16	26	52		1994	26	2	2	t	25	n													t			t											t			t
		46	f	schizophrenia	101	15	32	54		2001	19	3	3	t	18	t	1							t					t														t
		67	f	reference - CHAD						1991	29	0	4	t	21	n						t					wenlafaksyna				t												t
		67	m	CHAD - depression					37	2000	20	4	4	t	19	t	12		t			t					wenlafaksyna				t												t		t	t	t
		42	m	CHAD - depression					28	2019	1	1	1	t	8	t	4.5										wenlafaksyna			t						t							t
		45	m	schizophrenia	67	10	16	41		2001	19	1	1	t	18	t	168		t											t													t					t
		40	m	schizophrenia	98	14	24	60		2012	8	1	2	t	8	n								t		escitalopram			t			t											t					t	t
		34	m	CHAD - mania					38	2018	2	1	2	t	1	n			t	t																							t
		40	m	odniesienia - SCHI						2002	18	1	1	t	19	t	12				t								t							t							t
		49	m	CHAD - mania					28	2004	16	3	3	t	15	t	0.25			t	t				t		wenlafaksyna		t														t		t
		37	f	CHAD - mania					33	2019	1	1	1	n										t						t													n
		38	m	schizofrenia	95	19	28	48		2009	11	1	1	t	5	n																											t
		31	f	reference - CHAD						2013	7	0	1	t	6	n				t											t												t	t
		68	f	CHAD - depresja					28	1994	26	1	4	t	25	n			t	t	t										t												t
		26	m	reference - CHAD						2018	2	1	1	t	1	n				t										t													n
		49	f	CHAD - mania					22	2001	19	1	1	t	17	n				t								t								t							t		t
		61	f	CHAD - depresja					39	2011	9	1	2	t	8	t	4		t						t		wenlafaksyna				t												t			t
		66	f	CHAD - depresja					36	1981	39	4	4	t	38	t	12					t		t			wenlafaksyna				t												t		t	t		t
		46	f	schizofrenia	70	12	20	38		2019	1	1	1	t	1	n								t		citalopram					t					t							t					t
		28	f	schizofrenia	97	17	30	50		2016	4	1	1	t	3	n																				t							t
		69	f	CHAD - mania					20	1984	36	2	2	t	34	t	24		t												t												t		t	t
		32	f	CHAD - mania					30	2015	5	1	4	t	3	t	0.5			t	t							t			t					t							t
		39	f	schizofrenia	86	20	24	42		2000	20	4	4	t	19	n								t					t													t	t
		60	f	schizofrenia	110	19	30	61		2005	15	4	2	t	15	t	24					t		t		paroksetyna		t			t									t			t
		52	f	schizofrenia	96	19	30	47		2018	2	1	1	t	0.5	n								t							t											t	t
		61	f	reference - CHAD						1994	26	3	3	t	26	n				t	t										t												t		t
		31	f	schizofrenia	86	12	22	52		2008	12	2	2	t	11	t	6		t					t						t													t
		47	m	CHAD - mania					25	2019	1	1	1	n										t						t	t												n
		37	f	CHAD - mania					26	2002	18	2	3	t	16	t	0.25			t	t			t					t														t
		45	f	CHAD - depresja					36	1998	22	1	4	t	25	n			t	t						citalopram			t														t			t
		37	f	schizofrenia	94	18	23	53		2011	9	1	1	t	8	t	1							t						t			t										t
		33	m	CHAD - depresja					36	2018	2	1	1	t	3	t	0.5			t	t						wenlafaksyna									t							t
		63	m	odniesienia - SCHI						1990	30	1	1	t	30	n										sertralina				t									t				t
		26	m	CHAD - mania					24	2018	2	1	1	t	1	t	2							t						t													t		t
		40	f	schizofrenia	80	13	19	48		2010	10	1	1	t	8	n					t			t		escitalopram			t														t
		42	f	CHAD - depresja					25	2013	7	1	2	t	8	t	3									sertralina					t												t				t
		24	m	schizofrenia	96	18	29	49		2018	2	1	1	t	1	t	4.5																				t						t
		55	m	schizofrenia	90	17	31	42		2014	6	2	4	t	5	t	0.25							t													t				t		t
		68	f	reference - CHAD						2013	7	1	1	t	3	n				t							wenlafaksyna	t			t												n
		68	m	CHAD - depresja					15	1978	42	2	2	t	40	n			t									t			t												t			t
		23	f	CHAD - depresja					24	2017	3	1	1	t	2	t	12					t					wenlafaksyna																t
		29	f	CHAD - mania					22	2018	2	1	1	t	0.25	n				t											t												n
		30	f	CHAD - depresja					32	2017	3	1	4	t	2	t	12				t							t															t		t	t			t
		35	f	schizofrenia	82	9	26	47		2014	6	1	1	t	6	n										fluoksetyna				t						t							t					t
		41	m	schizofrenia	81	13	20	48		2015	5	2	2	t	5	t	42		t										t	t													t		t
		56	f	schizofrenia	97	18	30	49		2009	11	1	1	t	9	t	12			t							wenlafaksyna					t											t
		29	m	schizofrenia	60	19	9	32		2019	1	1	0	n		n																											n
		32	f	odniesienia - SCHI						2017	3	1	1	t	3	n										escitalopram			t														t
		61	f	CHAD - mania					28	1986	34	3	4	t	33	t	5		t	t				t			wenlafaksyna			t													t		t		t	t
		26	f	schizofrenia	106	24	29	53		2019	1	1	1	n		n								t						t													n
		62	f	reference - CHAD						1993	27	1	4	t	27	t	5		t	t						fluoksetyna					t												t	t
		51	f	CHAD - mania					34	1994	26	1	2	t	25	t	15													t													t	t			t
		41	f	schizofrenia	80	14	28	38		2002	18	4	4	t	17	n								t					t				t										t
		34	f	CHAD - mania					42	2018	2	1	1	t	2	t	18			t				t							t		t										t		t
		35	m	schizofrenia	88	20	26	42		2009	11	1	1	t	10	t	36													t													t
		34	m	CHAD - depresja					22	2018	2	1	1	t	1	n				t	t						wenlafaksyna																t
		24	m	schizofrenia	92	19	28	45		2018	2	1	1	t	2	t	0.5									fluoksetyna			t			t											t		t
		26	m	CHAD - depresja					35	2014	6	1	2	t	5	n						t		t			wenlafaksyna				t					t							t			t	t
		54	f	CHAD - depresja					31	2008	12	2	3	t	10	n					t		t				wenlafaksyna	t			t												t				t
		63	m	CHAD - mania					26	2019	1	1	1	t	3	n					t			t							t												t
		64	f	reference - CHAD						1991	29	1	1	t	29	t	3			t						fluoksetyna	wenlafaksyna																t		t
		24	f	schizofrenia	96	18	28	50		2017	3	1	1	t	3	t	7														t												t		t			t
		39	f	reference - CHAD						2016	4	1	1	t	4	t	4.5		t											t													t		t	t
		59	f	schizofrenia	84	20	19	45		1997	23	1	1	t	21	t	3														t						t						t
		43	m	schizofrenia	86	17	22	47		2018	2	1	1	n																							t						t		t			t	t
		47	m	CHAD - mania					28	2001	19	1	1	t	18	t	5			t										t													n
		48	m	CHAD - depresja					40	2013	7	2	2	t	6	t	5		t							fluoksetyna				t													t
		45	f	odniesienia - SCHI						2003	17	1	1	t	16	t	12			t						sertralina				t						t	t						t	t
		29	f	CHAD - depresja					31	2018	2	1	1	t	2	n				t							wenlafaksyna	t			t												t			t
		29	m	odniesienia - SCHI						2015	5	1	1	t	4	t	5.5																			t							t
		41	m	schizofrenia	106	21	26	59		2015	5	1	1	t	3	n			t							sertralina			t			t											t
		65	m	reference - CHAD						2006	14	2	3	t	14	n				t	t							t			t												t	t	t
		48	m	CHAD - depression					34	2009	11	4	4	t	10	n				t	t						wenlafaksyna				t						t						t					t
		46	m	schizophrenia	90	16	24	50		2013	7	1	2	t	5	t	3.5									sertralina			t														t
		34	f	reference - CHAD						2017	3	0	2	t	3	n				t							wenlafaksyna				t												t
		41	m	schizophrenia	79	18	25	36		2010	10	1	1	t	9	t	84													t		t											t
		49	f	CHAD - depression					23	2010	10	1	2	t	9	n			t					t		escitalopram																	t				t
		23	m	CHAD - mania					28	2017	3	1	1	t	2	n														t													t	t				t
		66	m	reference - CHAD						2002	18	1	1	t	18	t	48			t							t		t														t		t
		49	m	CHAD - mania					40	2003	17	1	1	t	4	t	6		t					t						t													t		t
		39	m	CHAD - mania					23	2014	6	2	3	t	4	n			t					t																			t
		43	m	reference - CHAD						2001	19	1	1	t	18	n						t						t									t						t						t
		50	m	chad - depression					38	2001	19	1	1	t	18	n			t		t										t												t
		43	m	schizophrenia	88	18	23	47		2001	19	1	1	t	18	n													t			t											t
		59	m	schizophrenia	86	11	27	48		2010	10	2	2	t	10	t	0.25		t									t								t							t
		57	m	CHAD - mania					31	2004	16	2	4	t	15	n				t	t										t												t		t
		51	m	reference - CHAD						2008	12	1	1	t	11	t	36			t											t												t
		30	f	schizophrenia	84	19	24	41		2015	5	1	1	t	3	t	5																			t							t			t	t
		50	m	schizophrenia	94	19	23	52		2003	17	2	2	t	14	t	84							t						t													t					t
		29	m	schizophrenia	88	15	25	48		2019	1	1	1	t	1	t	1										wenlafaksyna			t						t							t					t
		57	m	schizophrenia	110	24	32	54		1988	32	4	4	t	20	t	12									sertralina				t									t				t						t
		41	f	CHAD - mania					27	1995	25	1	2	t	25	n					t			t						t													t	t	t		t
		33	m	schizophrenia	74	9	22	43		2010	10	4	4	t	9	t	1																			t							t	t
		64	m	CHAD - depression					37	1992	28	2	4	t	28	n			t	t							wenlafaksyna	t	t														t
		59	f	CHAD - depression					33	2016	4	2	3	t	3	n			t								wenlafaksyna				t												t			t
		33	m	CHAD - depression					25	2010	10	1	2	t	9	t	12		t	t							wenlafaksyna																t
		54	m	schizophrenia	75	12	26	37		1998	22	2	2	t	20	t	6													t													t
		43	m	CHAD - depression					29	2000	20	4	4	t	19	t	1.5				t			t			duloksetyna				t												t			t		t
		54	m	CHAD - depression					32	2003	17	2	3	t	10	t	24						t								t												t		t	t	t
		61	m	CHAD - depression					32	2008	12	1	1	t	11	n						t				escitalopram					t												t					t
		37	m	schizophrenia	90	12	25	53		2004	16	1	3	t	16	t	36							t				t			t							t					t					t
		61	f	reference - CHAD	109	24	35	50		2007	13	4	4	t	6	t	24												t	t													t					t
		56	f	reference - CHAD						2006	14	1	2	t	14	n				t	t					escitalopram					t												t	t	t
		44	m	reference - CHAD						2018	2	1	1	t	2	n				t							wenlafaksyna				t												n
		51	m	CHAD - mania					27	2017	3	1	1	t	3	n					t						wenlafaksyna				t												t
		50	m	schizophrenia	99	21	27	51		2000	20	2	2	t	19	t	48							t					t														t		t			t
		62	f	CHAD - depression					32	2018	2	1	1	t	0.5	n				t										t													t						t
		68	f	schizophrenia	95	22	28	45		1980	40	4	4	t	38	n								t					t														t					t
																		chad	17	23	18	7	2	16	2	0	0	8	4	15	26	0	2	0	0	6	2	0	0	0	0	0
																		schizofrenia	5	4	1	1	0	18	0	0	0	4	17	14	6	8	3	0	1	9	5	2	1	1	1	3
																		odniesienie	2	16	5	4	0	0	0	0	1	3	4	4	13	0	0	0	0	4	2	0	1	0	0	0
[truncated: 256 more columns]

## Sheet: categories data
	CHAD - depression			SSRI		SNRI		7.		8.			n. hospitalisations & n. relapses:
	CHAD - mania			paroksetyna		wenlafaksyna		1		3				1	od 1 do 5
	schizophrenia			sertralina		duloksetyna		2		2			categories:	2	od 6 do 10
	reference - CHAD			fluoksetyna		tak		3		1				3	od 11 do 15
	reference - SCHI			escitalopram				4						4	>15
				citalopram				5
				fluwoksamina
				wortioksetyna
				tak
										pkt. 21 KomPAN
											0
										how many times	1 lub 2x
	currently:	f	m
	CHAD d	17	14
	CHAD m	11	12	54
	schi	22	25	47
	control - CHAD	11	8	19
	control - SCHI	3	3	6
		50	51
	sum:		101	25
	refusals:	7	8	15

## Sheet: numbers - drugs and diseases
		kwas walproinowy	lit	lamotrygina	karbamazepina	topiramat	benzodiazepiny	leki nasenne	SSRI	SNRI	inne p-depresyjne	klozapina	olanzapina	kwetiapina	amisulpryd	haloperidol	pernazyna	sulpiryd	aripiprazol	risperidon	pregabalina	zuklopentyksol	flupentyksol	lewomepromazyna	propranolol
	chad	17	23	18	7	2	16	2	0	0	8	4	15	26	0	2	0	0	6	2	0	0	0	0	0
	schizofrenia	5	4	1	1	0	18	0	0	0	4	17	14	6	8	3	0	1	9	5	2	1	1	1	3
	odniesienie	2	16	5	4	0	0	0	0	1	3	4	4	13	0	0	0	0	4	2	0	1	0	0	0
		nadciśnienie tt.	dyslipidemia	niedoczynność tarczycy	cukrzyca	ChNS	zes. jelita drażliwego	astma oskrzelowa	niedokrwistość	PCO
	chad	6	2	11	4	1	2	2	1	2
	schizofrenia	3	3	5	3	0	0	2	0	1
	odniesienie	8	1	7	0	1	1	2	0	0
		p-nadciśnieniowe	hipolipemizujące	p-cukrzycowe	p-histaminowe	steroidowe	p-zakrzepowe	h. tarczycy	IPP	p-bólowe	pozostałe
	chad	8	3	8	1	0	2	10	2	0	9
	schizofrenia	5	3	5	1	1	0	5	1	1	8
	odniesienie	9	2	0	0	0	0	7	0	0	0

## Sheet: Arkusz6
	data urodzenia	wiek w latach	płeć
	1990-06-20	32	k		A S-L	1990-06-20	29	k	FALSE	FALSE	TRUE
	1975-01-10	48	m		AC	1975-01-10	45	m	FALSE	FALSE	TRUE
	1981-12-11	41	m		AD	1981-12-11	38	m	FALSE	FALSE	TRUE
	1959-08-26	63	m		AI	1959-08-26	60	m	FALSE	FALSE	TRUE
	1984-02-29	39	k		AJ	1984-02-29	36	k	FALSE	FALSE	TRUE
	1970-05-18	52	m		AK	1970-05-18	49	m	FALSE	FALSE	TRUE
	1968-08-30	54	k		AK	1968-08-30	51	k	FALSE	FALSE	TRUE
	1969-01-14	54	m		AK	1969-01-14	51	m	FALSE	FALSE	TRUE
	1954-09-21	68	k		AK	1954-09-21	65	k	FALSE	FALSE	TRUE
	1993-09-06	29	k		AŁ	1993-09-06	26	k	FALSE	FALSE	TRUE
	1977-11-17	45	k		AŁ	1977-11-17	42	k	FALSE	FALSE	TRUE
	1995-09-16	27	k		AM	1995-09-16	24	k	FALSE	FALSE	TRUE
	1989-10-29	33	k		AM	1989-10-29	30	k	FALSE	FALSE	TRUE
	1975-03-06	48	k		AP	1975-03-06	45	k	FALSE	FALSE	TRUE
	1999-11-13	23	m		AR	1999-11-13	20	m	FALSE	FALSE	TRUE
	1995-05-01	27	k		AR	1995-05-01	24	k	FALSE	FALSE	TRUE
	1964-11-11	58	k		AS	1964-11-11	55	k	FALSE	FALSE	TRUE
	1984-05-10	38	k		AT	1984-05-10	35	k	FALSE	FALSE	TRUE
	1973-06-24	49	k		AU	1973-06-24	46	k	FALSE	FALSE	TRUE
	1977-04-15	46	k		AZ	1977-04-15	43	k	FALSE	FALSE	TRUE
	1956-01-25	67	k		BB	1956-01-25	64	k	FALSE	FALSE	TRUE
	1956-03-27	67	m		BB	1956-03-27	64	m	FALSE	FALSE	TRUE
	1980-05-07	42	m		BF	1980-05-07	39	m	FALSE	FALSE	TRUE
	1978-02-08	45	m		BF	1978-02-08	42	m	FALSE	FALSE	TRUE
	1982-12-04	40	m		BJ	1982-12-04	37	m	FALSE	FALSE	TRUE
	1988-08-26	34	m		BK	1988-08-26	31	m	FALSE	FALSE	TRUE
	1983-03-15	40	m		BO	1983-03-15	37	m	FALSE	FALSE	TRUE
	1973-05-07	49	m		BP	1973-05-07	46	m	FALSE	FALSE	TRUE
	1985-05-17	37	k		BS	1985-05-17	34	k	FALSE	FALSE	TRUE
	1985-01-21	38	m		BS	1985-01-21	35	m	FALSE	FALSE	TRUE
	1991-12-17	31	k		BW	1991-12-17	28	k	FALSE	FALSE	TRUE
	1955-02-25	68	k		DA	1955-02-25	65	k	FALSE	FALSE	TRUE
	1997-03-22	26	m		DB	1997-03-22	23	m	FALSE	FALSE	TRUE
	1973-06-28	49	k		DK	1973-06-28	46	k	FALSE	FALSE	TRUE
	1961-11-07	61	k		DL	1961-11-07	58	k	FALSE	FALSE	TRUE
	1956-05-25	66	k		DN	1956-05-25	63	k	FALSE	FALSE	TRUE
	1976-12-01	46	k		DP	1976-12-01	43	k	FALSE	FALSE	TRUE
	1994-07-28	28	k		DR	1994-07-28	25	k	FALSE	FALSE	TRUE
	1954-01-04	69	k		DZ	1954-01-04	66	k	FALSE	FALSE	TRUE
	1990-05-06	32	k		EC	1990-05-06	29	k	FALSE	FALSE	TRUE
	1983-10-25	39	k		EC	1983-10-25	36	k	FALSE	FALSE	TRUE
	1962-11-25	60	k		EC	1962-11-25	57	k	FALSE	FALSE	TRUE
	1970-09-15	52	k		EK	1970-09-15	49	k	FALSE	FALSE	TRUE
	1961-12-24	61	k		EN	1961-12-24	58	k	FALSE	FALSE	TRUE
	1991-12-10	31	k		EW	1991-12-10	28	k	FALSE	FALSE	TRUE
	1976-03-25	47	m		GB	1976-03-25	44	m	FALSE	FALSE	TRUE
	1985-08-09	37	k		HC	1985-08-09	34	k	FALSE	FALSE	TRUE
	1977-06-11	45	k		IK	1977-06-11	42	k	FALSE	FALSE	TRUE
	1985-12-27	37	k		IO	1985-12-27	34	k	FALSE	FALSE	TRUE
	1990-01-13	33	m		JB	1990-01-13	30	m	FALSE	FALSE	TRUE
	1959-05-06	63	m		JB	1959-05-06	60	m	FALSE	FALSE	TRUE
	1997-03-28	26	m		JD	1997-03-28	23	m	FALSE	FALSE	TRUE
	1982-12-08	40	k		JG	1982-12-08	37	k	FALSE	FALSE	TRUE
	1980-06-01	42	k		JO	1980-06-01	39	k	FALSE	FALSE	TRUE
	1998-12-31	24	m		JS	1998-12-31	21	m	FALSE	FALSE	TRUE
	1968-03-30	55	m		JS	1968-03-30	52	m	FALSE	FALSE	TRUE
	1954-11-06	68	k		JS	1954-11-06	65	k	FALSE	FALSE	TRUE
	1955-04-15	68	m		JT	1955-04-15	65	m	FALSE	FALSE	TRUE
	2000-03-30	23	k		KD	2000-03-30	20	k	FALSE	FALSE	TRUE
	1993-08-18	29	k		KD	1993-08-18	26	k	FALSE	FALSE	TRUE
	1992-11-01	30	k		KF	1992-11-01	27	k	FALSE	FALSE	TRUE
	1987-05-12	35	k		KK	1987-05-12	32	k	FALSE	FALSE	TRUE
	1981-09-28	41	m		KK	1981-09-28	38	m	FALSE	FALSE	TRUE
	1967-03-03	56	k		KK	1967-03-03	53	k	FALSE	FALSE	TRUE
	1994-01-15	29	m		KN	1994-01-15	26	m	FALSE	FALSE	TRUE
	1990-06-17	32	k		KP	1990-06-17	29	k	FALSE	FALSE	TRUE
	1961-09-04	61	k		KR	1961-09-04	58	k	FALSE	FALSE	TRUE
	1996-09-20	26	k		KZ	1996-09-20	23	k	FALSE	FALSE	TRUE
	1960-05-22	62	k		LS	1960-05-22	59	k	FALSE	FALSE	TRUE
	1972-04-19	51	k		M M-G	1972-04-19	47	k	FALSE	FALSE	TRUE
	1981-11-09	41	k		MA	1981-11-09	38	k	FALSE	FALSE	TRUE
	1989-03-29	34	k		MB	1989-03-29	31	k	FALSE	FALSE	TRUE
	1987-08-08	35	m		MB	1987-08-08	32	m	FALSE	FALSE	TRUE
	1989-03-09	34	m		MG	1989-03-09	31	m	FALSE	FALSE	TRUE
	1998-09-07	24	m		MK	1998-09-07	21	m	FALSE	FALSE	TRUE
	1997-02-14	26	m		MK	1997-02-14	23	m	FALSE	FALSE	TRUE
	1968-12-22	54	k		MK	1968-12-22	51	k	FALSE	FALSE	TRUE
	1960-03-04	63	m		MK	1960-03-04	60	m	FALSE	FALSE	TRUE
	1959-04-03	64	k		MŁ	1959-04-03	61	k	FALSE	FALSE	TRUE
	1998-09-17	24	k		MM	1998-09-17	21	k	FALSE	FALSE	TRUE
	1983-06-19	39	k		MM	1983-06-19	36	k	FALSE	FALSE	TRUE
	1963-08-11	59	k		MN	1963-08-11	56	k	FALSE	FALSE	TRUE
	1979-05-07	43	m		MP	1979-05-07	40	m	FALSE	FALSE	TRUE
	1975-10-17	47	m		MP	1975-10-17	44	m	FALSE	FALSE	TRUE
	1975-03-30	48	m		MP	1975-03-30	45	m	FALSE	FALSE	TRUE
	1977-12-17	45	k		MR	1977-12-17	42	k	FALSE	FALSE	TRUE
	1993-06-29	29	k		MS	1993-06-29	26	k	FALSE	FALSE	TRUE
	1993-06-07	29	m		MS	1993-06-07	26	m	FALSE	FALSE	TRUE
	1981-09-01	41	m		MS	1981-09-01	38	m	FALSE	FALSE	TRUE
	1957-08-18	65	m		MS	1957-08-18	62	m	FALSE	FALSE	TRUE
	1974-06-26	48	m		MW	1974-06-26	45	m	FALSE	FALSE	TRUE
	1977-02-15	46	m		NK	1977-02-15	43	m	FALSE	FALSE	TRUE
	1988-12-19	34	k		NM	1988-12-19	31	k	FALSE	FALSE	TRUE
	1982-02-14	41	m		NW	1982-02-14	38	m	FALSE	FALSE	TRUE
	1973-07-09	49	k		OK	1973-07-09	46	k	FALSE	FALSE	TRUE
	1999-05-18	23	m		PA	1999-05-18	20	m	FALSE	FALSE	TRUE
	1956-05-27	66	m		PB	1956-05-27	63	m	FALSE	FALSE	TRUE
	1973-10-21	49	m		PC	1973-10-21	46	m	FALSE	FALSE	TRUE
	1984-02-14	39	m		PD	1984-02-14	36	m	FALSE	FALSE	TRUE
	1979-10-11	43	m		PD	1979-10-11	40	m	FALSE	FALSE	TRUE
	1972-07-14	50	m		PG	1972-07-14	47	m	FALSE	FALSE	TRUE
	1979-05-05	43	m		PR	1979-05-05	40	m	FALSE	FALSE	TRUE
	1963-06-19	59	m		PS	1963-06-19	56	m	FALSE	FALSE	TRUE
	1965-08-12	57	m		PŚ	1965-08-12	54	m	FALSE	FALSE	TRUE
	1969-03-14	51	m		PT	1969-03-14	51	m	FALSE	TRUE	TRUE
	1993-01-04	30	k		PW	1993-01-04	27	k	FALSE	FALSE	TRUE
	1973-04-06	50	m		PW	1973-04-06	47	m	FALSE	FALSE	TRUE
	1993-08-01	29	m		RA	1993-08-01	26	m	FALSE	FALSE	TRUE
	1966-02-01	57	m		RB	1966-02-01	54	m	FALSE	FALSE	TRUE
	1982-03-08	41	k		RF	1982-03-08	38	k	FALSE	FALSE	TRUE
	1990-01-08	33	m		RG	1990-01-08	30	m	FALSE	FALSE	TRUE
	1959-02-28	64	m		RJ	1959-02-28	61	m	FALSE	FALSE	TRUE
	1963-09-02	59	k		RM	1963-09-02	56	k	FALSE	FALSE	TRUE
	1990-03-16	33	m		RN	1990-03-16	30	m	FALSE	FALSE	TRUE
	1968-12-08	54	m		RR	1968-12-08	51	m	FALSE	FALSE	TRUE
	1979-08-27	43	m		SB	1979-08-27	40	m	FALSE	FALSE	TRUE
	1968-05-16	54	m		TD	1968-05-16	51	m	FALSE	FALSE	TRUE
	1961-12-08	61	m		TR	1961-12-08	58	m	FALSE	FALSE	TRUE
	1986-03-22	37	m		TT	1986-03-22	34	m	FALSE	FALSE	TRUE
	1962-01-06	61	k		TW	1962-01-06	58	k	FALSE	FALSE	TRUE
	1967-02-17	56	k		UM	1967-02-17	53	k	FALSE	FALSE	TRUE
	1978-10-09	44	m		WK	1978-10-09	41	m	FALSE	FALSE	TRUE
	1972-03-18	51	m		WK	1972-03-18	48	m	FALSE	FALSE	TRUE
	1972-05-19	50	m		WZ	1972-05-19	47	m	FALSE	FALSE	TRUE
	1960-05-12	62	k		ZJ	1960-05-12	59	k	FALSE	FALSE	TRUE
	1955-04-16	68	k		ZJ	1955-04-16	64	k	FALSE	FALSE	TRUE
